# Supplementary material for: Higher level of Quinolones residue in poultry meat and eggs; an alarming public health issue in Nepal
Source: Research Square preprint supplement (doi:10.21203/rs.3.rs-7031363/v1), 2025-07-28
Supplement: Supplementary file 1 [file e9845c2a5fc9eece58ea8315.pdf]

## **ANNEX-I**

### **Questionnaire Survey**

#### **Assessing antimicrobial residue in poultry meat and eggs of Kathmandu valley (In EpiCollect Apps)**

**Name:**

**Office/Organization:**

**Address:**

**Office:**

**Telephone:**

**Gender:** M/F

**Age group:**

- ☐ 24 years below
- ☐ 25-29 years
- ☐ 30-34 years
- ☐ 35-39 years
- ☐ 40-44 years
- ☐ 45-49 years
- ☐ 50-54 years
- ☐ 55-59 years
- ☐ 60 years and over

**Level of Education:**

- ☐ Literate
- ☐ High School Degree
- ☐ Bachelor Degree
- ☐ University Degree or Above

**Occupation:**

- ☐ Veterinarian/consultants
- ☐ Non-vet feed consultants
- ☐ Drug distributor

- Broiler farmer
- Layer farmer

1. What are the major infectious diseases in poultry these days?

(Top 3 in descending order)

2. Which antimicrobial do you most commonly use/prescribe in broiler chicken these days?

(Top 3 in descending order)

3. Which antimicrobial do you most commonly use/prescribe in layer chicken these days?

(Top 3 in descending order)

4. Do you recommend antimicrobials as a prevention of diseases in poultry? Y/N

a. If yes, mostly which in broiler chicken?

b. If yes, mostly which in layer chicken?

5. Do you use antimicrobials as growth promoters in poultry feed? Y/N

a. If yes, mostly which in broiler feed?

b. If yes, mostly in which in layer feed?

6. Which antimicrobial of poultry are you selling/importing in large volumes for last one month?

(Top 3 in descending order)

7. Are you aware of detrimental effects on human health due to antimicrobial residue in meat and eggs? Y/N

8. Do you take care of antibiotic withdrawal period while prescribing antibiotics? Y/N

9. Do you advice/continue selling the meat and eggs during administration of antimicrobials? Y/N
